# Prospective Study of the Quality of Colonoscopies Performed by Primary Care Physicians: The Alberta Primary Care Endoscopy (APC-Endo) Study

Michael R. Kolber<sup>1\*</sup>, Clarence K. W. Wong<sup>2</sup>, Richard N. Fedorak<sup>2</sup>, Brian H. Rowe<sup>3</sup>, on behalf of the APC-Endo Study Physicians<sup>†</sup>

**1** Department of Family Medicine, University of Alberta, Edmonton, Alberta, Canada, **2** Department of Gastroenterology, University of Alberta, Edmonton, Alberta, Canada, **3** Department of Emergency Medicine, University of Alberta, Edmonton, Alberta, Canada

## Abstract

**Background:** The quality of colonoscopies performed by primary care physicians (PCPs) is unknown.

**Objective:** To determine whether PCP colonoscopists achieve colonoscopy quality benchmarks, and patient satisfaction with having their colonoscopy performed by a primary care physician.

**Design:** Prospective multi-center, multi-physician observational study. Colonoscopic quality data collection occurred via completion of case report forms and pathological confirmation of lesions. Patient satisfaction was captured by a telephone survey.

**Setting:** Thirteen rural and suburban hospitals in Alberta, Canada.

**Measurements:** Proportion of successful cecal intubations, average number of adenomas detected per colonoscopy, proportion of patients with at least one adenoma, and serious adverse event rates; patient satisfaction with their wait time and procedure, as well as willingness to have a repeat colonoscopy performed by their primary care endoscopist.

**Results:** In the two-month study period, 10 study physicians performed 577 colonoscopies. The overall adjusted proportion of successful cecal intubations was 96.5% (95% CI 94.6–97.8), and all physicians achieved the adjusted cecal intubation target of  $\geq 90\%$ . The average number of adenomas detected per colonoscopy was 0.62 (95% CI 0.5–0.74). 46.4% (95% CI 38.5–54.3) of males and 30.2% (95% CI 22.3–38.2) of females  $\geq 50$  years of age having their first colonoscopy, had at least one adenoma. Four serious adverse events occurred (three post polypectomy bleeds and one perforation) and 99.3% of patients were willing to have a repeat colonoscopy performed by their primary care colonoscopist.

**Limitations:** Two-month study length and non-universal participation by Alberta primary care endoscopists.

**Conclusions:** Primary care physician colonoscopists can achieve quality benchmarks in colonoscopy. Training additional primary care physicians in endoscopy may improve patient access and decrease endoscopic wait times, especially in rural settings.

**Citation:** Kolber MR, Wong CKW, Fedorak RN, Rowe BH, on behalf of the APC-Endo Study Physicians (2013) Prospective Study of the Quality of Colonoscopies Performed by Primary Care Physicians: The Alberta Primary Care Endoscopy (APC-Endo) Study. PLoS ONE 8(6): e67017. doi:10.1371/journal.pone.0067017

**Editor:** Lise Lotte Gluud, Copenhagen University Hospital Gentofte, Denmark

**Received:** February 4, 2013; **Accepted:** May 14, 2013; **Published:** June 27, 2013

**Copyright:** © 2013 Kolber et al. This is an open-access article distributed under the terms of the Creative Commons Attribution License, which permits unrestricted use, distribution, and reproduction in any medium, provided the original author and source are credited.

**Funding:** The study was funded by the Alberta Rural Physician Action Plan. The funders had no role in study design, data collection and analysis, decision to publish, or preparation of the manuscript

**Competing Interests:** The authors have declared that no competing interests exist.

\* E-mail: mkolber@ualberta.ca

<sup>†</sup> The APC-Endo Study Physicians are provided in the Acknowledgments.

## Introduction

Colorectal cancer is the second most common cause of death from a malignancy in Canada [1,2]. Colonoscopy is a cost-effective tool in screening patients for colorectal cancer [3,4], and is also used to investigate patients with gastrointestinal symptoms [5].

Colorectal cancer screening campaigns have fueled an increased demand for colonoscopies [6–8], while a shortage of

colonoscopists has contributed to excessive wait times [9,10]. In Canada, endoscopic wait times, depending on the indication, are up to 7.2 times longer than recommended targets [10]. For example, only 41% of patients with a positive fecal occult blood test had a colonoscopy within recommended timeframes [10,11]. In Canada, gastroenterologists and general surgeons perform 97% of all colonoscopies [12]. Training primary care physicians (PCPs) in gastrointestinal medicine and endoscopy may improve

patient access and wait times for endoscopy, especially for rural patients.

Although recent studies demonstrate that primary care physicians can perform quality colonoscopies [13–15], earlier research showed less optimal results [16–18]. In addition, many studies had methodological issues including single endoscopist reporting [13–21], retrospective data collection [13–16,19–24], or the use of older monocular endoscopes [16–20]. Other studies did not report the method [18,19,21] or potentially used inaccurate methods of confirming cecal intubation [16,20,25]. A systematic review, that concluded that primary care physicians can perform quality colonoscopies [26], was criticized [27] for including a study where an on-site gastroenterologist could assist the PCP colonoscopist [28]. Recent Canadian studies, using administrative databases, claim future cancer rates are higher when colonoscopies are performed by non-gastroenterologists [29–31]. Clearly, additional high quality research is required to determine whether primary care physicians can perform quality colonoscopies.

The Alberta Primary Care Endoscopy (APC-Endo) Study is the first Canadian, prospective, multi-center health outcomes study to examine the quality of colonoscopic procedures performed by a group of primary care physicians in Canada. The study's primary objective was to determine the proportion of successful cecal intubations and adenomas detected in colonoscopies performed by Alberta family physicians and general internists. These results were compared to standards defined by the United States Multi-Society Task Force on Colorectal Cancer (USMSTF) [32,33]. Secondary objectives included a determination of serious adverse events (SAEs), other quality markers such as procedural and withdrawal times, patient comfort level during the procedure, and the percentage of patients referred to a specialist for their gastrointestinal problem, and patient satisfaction related to the colonoscopy.

## Methods

All 17 family physicians and general internists performing colonoscopies in Alberta were identified and approached to voluntarily participate in the study. A pre-study questionnaire was sent to participating physicians to explore their practice characteristics and colonoscopic experience. Both participating physicians and their assistants completed case report forms at the time of the patients' colonoscopy (Form S1). Prior to having their colonoscopy, patients provided written consent to a patient satisfaction telephone survey adapted from the Group Health Association of America 9 (GHAA-9) [34] and the University of Calgary Gastrointestinal Endoscopy Unit Patient Satisfaction Questionnaires [35] (Form S2). Patients were excluded from participating in the telephone survey if they were under 18 years of age, likely unable to be contacted for the survey, did not comprehend or speak English, or were cognitively impaired rendering them unable to complete the initial consent for their colonoscopy. Centrally located study assistants administered the patient satisfaction telephone survey approximately one month after the patient's colonoscopy. All significant lesions required pathological confirmation to be included in the analysis and independent external adjudicators reviewed all potentially serious adverse events.

## Ethics Statement

Ethical approval for the study was granted by the University of Alberta's Health Research Ethics Board.

## Outcome Measures

**Proportion of successful cecal intubations.** Colonoscopy completion was determined by visualization of any cecal or ileal landmarks including the appendiceal orifice, cecal trifolds, ileocecal valve or intubation of the terminal ileum. The crude proportion of successful cecal intubations was calculated by dividing the total number of colonoscopies where cecal intubation was achieved by the total number of colonoscopies attempted. The adjusted proportion of successful cecal intubations was calculated by dividing the total number of colonoscopies where cecal intubation was achieved by the total number of colonoscopies attempted minus the number of procedures limited by poor bowel preparation, colonic stricture, equipment failure or severe endoscopic colitis in which forward advancement was not possible.

$$\text{Adjusted proportion of successful cecal intubations} = \frac{\# \text{colonoscopies where cecal intubation achieved}}{(\# \text{colonoscopies attempted}) - (\# \text{incomplete colonoscopies due to poor bowel preparation} + \text{stricture} + \text{equipment failure} + \text{severe colitis})}$$

As all physicians performed both diagnostic and screening colonoscopies, competency in cecal intubation was determined by comparing the adjusted proportion of successful cecal intubations to the USMSTF targets of  $\geq 90\%$  [32,33].

**Adenoma detection.** The average number of adenomas detected per colonoscopy was determined by dividing the total number of pathologically confirmed adenomas by the number of colonoscopies performed. In addition, the proportion of patients  $\geq 50$  years, having their first colonoscopy with at least one pathologically confirmed adenoma was compared to USMSTF benchmarks of 25% for males and 15% for females [32,33]. Advanced adenomas were defined as adenomas greater than 1cm, or containing villous components or high-grade dysplasia on pathology. Serrated adenomas, an evolving pathological entity of polyps initially thought to be hyperplastic, but now shown to have distinct pathological architecture and potential for dysplasia [36] were grouped with adenomas for analysis.

**Potentially serious adverse events.** Potentially serious adverse events (SAEs), reported by physicians or patients, were investigated and externally adjudicated by two independent adjudicators. A third independent adjudicator (a gastroenterologist) reconciled any adjudicator disagreements. Definitions of serious adverse events were derived from the American Society of Gastrointestinal Endoscopy (ASGE) [37,38]. Bleeding was defined as blood loss, resulting in admission to hospital, a blood transfusion, a second colonoscopy or surgery. Perforations required clinical and radiographic evidence. Procedural sedation adverse events were defined as occurring if the colonoscopy is prematurely aborted, reversal agents are required, the patient requires assisted ventilation, or the patient is admitted to hospital after the procedure for any new cardiac or respiratory condition related to use of sedation agents. Frequency of SAEs were compared to published standards of bleeding ( $<1/100$ ) [32,33], perforation (1/500 to 1/1000) [33], and procedural sedation ( $<1/100$ ) [32].

**Statistical analysis.** Prior to commencing the study, it was estimated that approximately 15 primary care physicians perform colonoscopies in Alberta. A convenience sample of three primary care colonoscopists revealed they perform an average of 20 colonoscopies per month. Assuming that 12 of the 15 physicians would agree to participate, approximately 240 procedures would be performed per month. Therefore, for our two-month study, it was estimated that 480–500 cases would be available to analyze.

Assuming that 80% of patients would agree to the post-procedure telephone survey, 384 phone interviews would be performed. Estimating an overall adjusted cecal intubation rate of 90%, this sample size would provide 2.5% confidence intervals (CI) around the main point estimates. A significantly larger sample size would be required to provide CI within  $\pm 1\%$ , which was not feasible for the primary care colonoscopists and given funding constraints.

Binary outcomes, such as proportion of successful cecal intubations or age- and sex-specific average number of adenomas detected, are reported as percentages with 95% confidence intervals (CI) and compared to quality standards using *z* statistics. Continuous variables are reported as means and standard deviations (SD) or medians and interquartile ranges (IQR), as appropriate. Logistic regression analysis was performed to determine which variables predicted incomplete colonoscopies; results are reported as odds ratio (OR) with 95% CI. Statistical analysis was performed with Stata<sup>TM</sup> 11.

## Results

Ten of 17 identified primary care colonoscopists (eight family physicians and two general internists) participated in the study. These physicians had performed an estimated median of 1850 colonoscopies (interquartile range [IQR] 1400–4000) in their career prior to commencing the study. All physicians perform polypectomies, and nine out of 10 administer their own procedural sedation. They perform their colonoscopies at 13 different hospitals (i.e., three physicians perform endoscopy at two sites), including 11 rural sites. Only three sites have local surgical back up (Table 1).

Data collection occurred between March and August 2010. Ten physicians performed a total of 579 colonoscopies during the study using combinations of Olympus 160 and 180 SD and 180 HD as well as Pentax 70 SD and 90i series HD colonoscopes. Two patients, under 18 years of age, were excluded, leaving 577 colonoscopies for analysis. Each physician performed a median of 52 colonoscopies (IQR 38–78) in their two-month study period. The mean patient age was 57.6 years of age (SD: 13.3) and 51% were female (Table 2). For 65% of patients, the study colonoscopy was their first colonoscopy. All study physicians performed both screening and diagnostic colonoscopies, with 45.9% of the colonoscopies performed to screen for colorectal cancer (including family history of colorectal cancer, Lynch syndrome or familial adenomatous polyposis; positive FOBT; and average risk screening) and 40.2% were performed to investigate gastrointestinal symptoms.

## Outcomes

**Cecal intubation.** Cecal intubation was achieved in 550 of 577 colonoscopies for a crude proportion of successful cecal intubations of 95.3% (95% CI 93.3–96.9) (Table 3), which was statistically greater than 90% ( $p = 0.00004$ ). The terminal ileum was intubated in 41.3% (95% CI 36.9–45.1) of completed colonoscopies and 89.3% of successful cecal intubations reported visualizing two or more cecal landmarks or the terminal ileum. Individual physician's crude proportion of successful cecal intubations ranged from 87.8–100%. After seven cases were excluded (stricture/obstruction [four], poor bowel preparation [two] and severe inflammatory bowel disease [one]), the overall adjusted proportion of successful cecal intubations was 96.5% (95% CI 94.6–97.8). All 10 physicians achieved the adjusted cecal intubation target of  $\geq 90\%$ . Using the USMSTF definition of adjusted cecal intubation (only excluding poor preparation and severe colitis), the group's adjusted proportion of successful cecal

intubations was 95.8% (95% CI 93.8–97.3) and only one physician's achieved less than 90%.

**Predictors of incomplete colonoscopies.** The odds of having an incomplete colonoscopy were significantly increased in patients with poor bowel preparations, (OR = 4.5; 95% CI: 1.2–17.2) and patients over the age of 65 years (OR = 2.9; 95% CI: 1.3–6.3). Female patients were also at higher risk of having an incomplete colonoscopy, but this was not statistically significant (OR = 2.2; 95% CI: 0.97–5.15). The type of PCP endoscopist (family physician or general internist), volume of colonoscopies performed, indication for colonoscopy or inpatient status did not significantly influence the proportion of successful cecal intubations.

**Adenoma detection.** A total of 360 adenomas were pathologically confirmed (272 adenomas, 50 advanced adenomas, 34 serrated adenomas and four advanced serrated adenomas) for an overall average of 0.62 adenomas/colonoscopy. Individual physicians' adenoma detection average ranged from 0.13 to 1.54 adenomas/colonoscopy. Although the participant with the shortest average withdrawal time also had the lowest average number of adenomas/colonoscopy, collectively the five physicians whose average withdrawal times were  $\leq 6$  minutes (mean withdraw time 4.7 min) had similar adenoma detection averages (0.58 vs. 0.65):  $p = 0.28$  compared to the five who averaged  $\geq 6$  minutes withdrawal times (mean withdraw time 8.4 minutes).

At least one adenoma was found in 46.4% (95% CI: 38.5–54.3) of males and 30.2% (95% CI: 22.3–38.2) of females  $\geq 50$  years of age undergoing their first colonoscopy. These rates were greater than the USMSTF benchmarks of 25% and 15% ( $p < 0.0001$  for both). Twelve cases of colorectal cancer were pathologically confirmed for a colorectal cancer incidence of 2.1% (95% CI: 5.2, 18.7).

**Potential serious adverse events.** A total of 18 potential adverse events were investigated, nine reported by a patient and nine reported by a study physician. External adjudicators concluded that four serious adverse events (three bleeds and one perforation) occurred. All three bleeds occurred after snare cautery for advanced adenomas in patients  $> 50$  years of age. These three patients were admitted to hospital (median stay of 2 days). One patient was transfused 3 units of packed red blood cells, while no patient required a repeat colonoscopy or surgery. The perforation occurred during rectal retroflexion in a 79-year-old male with radiation proctitis. The complication was recognized during the procedure; the patient had a laparotomy with primary repair of the defect and was discharged home from his local hospital five days later.

The calculated risk of post-colonoscopy bleeding [ $3/577 = 0.52\%$  (95% CI: 0.11, 1.5%)] was not significantly different than the target of  $\leq 1/100$  [33], ( $p = 0.40$ ) and the perforation rate [ $1/577 = 0.17\%$  (95% CI: 0.004%, 0.96%)] was between the accepted targets of  $1/500$  and  $1/1000$  [32,33]. There were no serious complications related to procedural sedation and no deaths in the study.

**Sedation agents and doses.** Midazolam (Versed) was the most commonly used sedation agent ( $n = 570$ ), followed by Fentanyl ( $n = 494$ ) and propofol (Diprivan) ( $n = 140$ ). Overall, only five physicians used propofol. Three endoscopists (two who were also general practice- anesthetists and one who had sedation administered by an anesthetist) accounted for 86.4% of the propofol use. One case was performed without any sedation.

**Patient comfort level.** Patients tolerated the colonoscopies, experiencing only one or two well-tolerated episodes of discomfort in 45.1% of the cases and no discomfort in 40.4% of cases.

**Table 1.** Participating physician and practice characteristics for the Alberta Primary Care Endoscopy study.

| Physician     | Physician Gender | Physician Group | Location         | Number of Colonoscopies in Practice | Years Performing Colonoscopies | Perform Polypectomies | Sedation Administration | Local Surgical Backup |
|---------------|------------------|-----------------|------------------|-------------------------------------|--------------------------------|-----------------------|-------------------------|-----------------------|
| 1             | M                | FM              | Rural            | 1700                                | 10                             | Yes                   | Self                    | No                    |
| 2             | M                | FM              | Rural            | 4000                                | 10                             | Yes                   | Self <sup>a</sup>       | No                    |
| 3             | M                | FM              | Rural            | 8000                                | 21                             | Yes                   | Self                    | No                    |
| 4             | M                | GIM             | Regional         | 2800                                | 14                             | Yes                   | Anaesthesia             | Yes                   |
| 5             | F                | GIM             | Regional         | 60                                  | 1                              | Yes                   | Self                    | Yes                   |
| 6             | M                | FM              | Rural            | 1500                                | 6                              | Yes                   | Self                    | No                    |
| 7             | M                | FM              | Rural            | 2000                                | 15                             | Yes                   | Self                    | No                    |
| 8             | M                | FM              | Rural            | 4000                                | 15                             | Yes                   | Self <sup>a</sup>       | Yes                   |
| 9             | M                | FM              | Rural            | 1400                                | 4                              | Yes                   | Self                    | No                    |
| 10            | M                | FM              | Rural            | 1000                                | 3                              | Yes                   | Self                    | No                    |
| <b>Totals</b> | <b>90% M</b>     | <b>80% FM</b>   | <b>80% Rural</b> | <b>Median: 1850</b>                 | <b>Median: 10</b>              | <b>100%</b>           | <b>90% Self</b>         | <b>30%</b>            |

M = male; F = female.  
 FM = Family Medicine; GIM = General Internal Medicine.  
<sup>a</sup>General practice – Anaesthetists (Gp-A).  
 doi:10.1371/journal.pone.0067017.t001

**Table 2.** Patient characteristics for the Alberta Primary Care Endoscopy study.

| Physician                   | Colonoscopies Performed | Mean Patient Age (years) | Female (%)               | Inpatient (%)         | First-time Colon (%)     | Indications (%)          |                          |
|-----------------------------|-------------------------|--------------------------|--------------------------|-----------------------|--------------------------|--------------------------|--------------------------|
|                             |                         |                          |                          |                       |                          | Screening                | Symptoms                 |
| 1                           | 54                      | 56.4                     | 59.3                     | 5.6                   | 51.9                     | 37.0                     | 42.6                     |
| 2                           | 72                      | 57.0                     | 52.8                     | 2.8                   | 66.7                     | 48.6                     | 36.1                     |
| 3                           | 95                      | 59.3                     | 59.0                     | 0.0                   | 66.3                     | 63.2                     | 26.3                     |
| 4                           | 31                      | 60.8                     | 32.3                     | 0.0                   | 64.5                     | 38.7                     | 41.9                     |
| 5                           | 38                      | 47.3                     | 42.1                     | 2.6                   | 68.4                     | 29.0                     | 47.4                     |
| 6                           | 40                      | 57.8                     | 52.5                     | 0.0                   | 62.5                     | 52.5                     | 35.0                     |
| 7                           | 38                      | 58.3                     | 57.9                     | 0.0                   | 73.7                     | 36.8                     | 52.6                     |
| 8                           | 82                      | 61.5                     | 45.1                     | 2.4                   | 59.8                     | 42.7                     | 47.6                     |
| 9                           | 78                      | 59.4                     | 46.2                     | 1.3                   | 69.2                     | 57.7                     | 30.8                     |
| 10                          | 49                      | 52.3                     | 55.1                     | 4.1                   | 69.4                     | 24.5                     | 61.2                     |
| <b>Overall Totals/Means</b> | <b>577</b>              | <b>57.6 (SD = 13.3)</b>  | <b>51.1 (47.0, 55.2)</b> | <b>1.9 (0.7, 3.2)</b> | <b>65.0 (61.1, 69.0)</b> | <b>45.9 (41.8, 50.0)</b> | <b>40.2 (36.1, 44.3)</b> |

% = percentage; SD = standard deviation.

Overall totals/means : reported with 95% confidence intervals except age reported with standard deviations.

Screening includes : family history of colorectal cancer, Lynch syndrome or familial adenomatous polyposis; positive FOBT; and average risk screening.

doi:10.1371/journal.pone.0067017.t002

**Specialist referrals.** Twenty-eight patients (4.8%; 95% CI: 3.2, 6.9]) were referred to a specialist for their gastrointestinal problems: 20 for definitive surgical management and eight for ongoing disease management.

**Patient satisfaction survey.** Five hundred and thirty of 577 (91.8%; 95% CI: 89.3–93.9) patients consented to the patient satisfaction phone survey, and 443 (83.5%) of the surveys were completed (Figure 1). Inability to contact the patient (55 cases) and withdrawal of consent (21 cases) were the most common reasons for not completing the satisfaction survey. Using 7-point Likert scales, the median wait time satisfaction score was 7 (IQR 5–7) and the median score for the hospital experience for their colonoscopy was also 7 (IQR 6–7). The overwhelming majority [440/443 (99.3%; 95%CI: 98.0–99.7)] of patients were willing to have a repeat colonoscopy performed by their primary care colonoscopist.

**Discussion**

To our knowledge, this is the largest multi-centered PCP endoscopy study conducted in Canada, and the first prospective study with standard, robust, and externally adjudicated outcome measures. The APC-Endo Study demonstrated that PCPs can achieve standard benchmarks in colonoscopy performance. The group’s adjusted proportion of successful cecal intubations cecal intubations was 96.5%, with all physicians achieving adjusted cecal intubation targets of ≥90%. Our adjusted cecal intubation success formula differs from the USMSTF formula [32,33] in that it reflects the skills of the primary care colonoscopist (do not dilate strictures) and does not include equipment malfunction, which is outside of the control of the endoscopist. Even using the USMSTF definition of adjusted cecal intubation success, the group achieved the benchmark standard of 90%.

These results compare favorably with published specialist data. For example, in a study of 17,868 colonoscopies, only 55% of American and Canadian gastroenterologists achieved cecal intubation rates ≥90% [39]. Another study of 5,477 colonoscopies performed by 10 American gastroenterologists revealed cecal intubation rates of 89.8% [40]. In Canada, the Practice Audit in

Gastroenterology (PAGE) program’s provincial cecal intubation rates were between 86–94% [41], and another study of gastroenterologists and general surgeons found 10% had cecal intubation rates of <85% [8]. It is important to recognize that even specialists may have difficulties achieving cecal intubation targets.

The average number of adenomas detected per colonoscopy is a more meaningful marker of quality colonoscopy as it evaluates both technical competency, and indirectly measures appropriate patient selection, colonoscopy intervals, and bowel preparation quality. The APC-Endo Study PCPs detected on average 0.62 adenomas/colonoscopy, with individual physician adenoma detection ranging from 0.13 to 1.54 adenomas/colonoscopy. This variability may be partially explained by patient age and indication for the colonoscopy; however, existing literature demonstrates similar inter-physician variability in adenoma detection. In one study, the overall adenoma detection by 12 experienced gastroenterologists was 0.47 adenomas/colonoscopy, with individual physician’s results ranged from 0.1 to 1.05 adenomas/colonoscopy [42]. Another study of over 10, 000 colonoscopies performed by nine gastroenterologists concluded that the colonoscopist affects adenoma detection more than patient age or gender [43].

In our study, the proportion of males and females, over 50 years old, undergoing their first colonoscopy with at least one adenoma was 46.4% and 30.2% respectively. These results exceed the USPMTF minimum benchmarks of 25% and 15% [32,33], but are comparable to rates observed in an Albertan colorectal cancer screening facility (Jonathon Love, University of Calgary, personal communication).

Serious adverse events were comparable to suggested targets and to results seen in large Canadian population-based studies. These studies report overall bleeding rates between 1.0 to 1.6/1000 colonoscopies [44,45], which increase to 6.4/1000 in cases where polypectomies were performed [44]. While our observed bleeding risk of 5.2/1000 colonoscopies appears within these margins, the relatively small sample size provides wide confidence intervals. Our perforation rate is also comparable to results seen in clinical practice [44–46]. Recent Canadian studies report perfo-

**Table 3.** Quality Outcomes of the Alberta Primary Care Endoscopy Study.

| Physician             | Colonoscopies Performed | Crude Proportion Successful Cecal Intubations (%) | Adjusted Proportion Successful Cecal Intubations (%) | USMSTF Adjusted Proportion Successful Cecal Intubations (%) <sup>a</sup> | Average Adenoma Detection <sup>b</sup> | Proportion Males <sup>c</sup> ≥50years with Adenoma (%) | Proportion Females <sup>d</sup> ≥50years with ≥1 Adenoma (%) | Average Procedural Times (min) | Average Withdrawal Time <sup>e</sup> (min) | Serious Adverse Events (#) |
|-----------------------|-------------------------|---------------------------------------------------|------------------------------------------------------|--------------------------------------------------------------------------|----------------------------------------|---------------------------------------------------------|--------------------------------------------------------------|--------------------------------|--------------------------------------------|----------------------------|
| 1                     | 54                      | 96.3                                              | 96.3                                                 | 96.3                                                                     | 0.46                                   | 60.0                                                    | 20.0                                                         | 24.4                           | 8.4                                        | 1                          |
| 2                     | 72                      | 100                                               | 100                                                  | 100                                                                      | 1.01                                   | 57.9                                                    | 33.3                                                         | 24.6                           | 5.2                                        | 0                          |
| 3                     | 95                      | 96.8                                              | 98.9                                                 | 97.9                                                                     | 0.35                                   | 23.8                                                    | 20.0                                                         | 21.6                           | 9.7                                        | 0                          |
| 4                     | 31                      | 96.8                                              | 100                                                  | 96.8                                                                     | 0.36                                   | 27.3                                                    | 0.0 <sup>f</sup>                                             | 20.7                           | 4.9                                        | 0                          |
| 5                     | 38                      | 89.5                                              | 94.4                                                 | 91.9                                                                     | 0.13                                   | 25.0                                                    | 0.0 <sup>g</sup>                                             | 19.7                           | 4.1                                        | 0                          |
| 6                     | 40                      | 92.5                                              | 92.5                                                 | 92.5                                                                     | 0.6                                    | 57.1                                                    | 37.5                                                         | 26.3                           | 5.7                                        | 0                          |
| 7                     | 38                      | 94.7                                              | 94.7                                                 | 94.7                                                                     | 0.37                                   | 50.0                                                    | 30.0                                                         | 21.5                           | 3.8                                        | 0                          |
| 8                     | 82                      | 87.8                                              | 90.0                                                 | 88.9                                                                     | 0.31                                   | 30.4                                                    | 14.3                                                         | 23.6                           | 6.2                                        | 2                          |
| 9                     | 78                      | 97.4                                              | 97.4                                                 | 97.4                                                                     | 1.54                                   | 66.7                                                    | 57.9                                                         | 27.7                           | 9.1                                        | 0                          |
| 10                    | 49                      | 100                                               | 100                                                  | 100                                                                      | 0.61                                   | 70.0                                                    | 50.0                                                         | 23.2                           | 7.8                                        | 1                          |
| <b>Overall Means*</b> | <b>58 (SD = 22.3)</b>   | <b>95.3 (93.3, 96.9)</b>                          | <b>96.5 (94.6, 97.8)</b>                             | <b>95.8 (94.1, 97.5)</b>                                                 | <b>0.62 (0.51, 0.74)</b>               | <b>46.4 (38.5, 54.3)</b>                                | <b>30.2 (22.3, 38.2)</b>                                     | <b>23.6 (22.7, 24.5)</b>       | <b>7.0 (6.6, 7.4)</b>                      | <b>4</b>                   |

<sup>a</sup>USMSTF adjusted proportion of successful cecal intubations excludes incomplete colonoscopies due to poor bowel preparation and severe colitis.  
<sup>b</sup>Number of pathologically confirmed adenomas/number of colonoscopies<sup>c,d</sup> Proportion of males<sup>c</sup> or females<sup>d</sup> ≥50 years old, first time colonoscopy with pathologically confirmed adenoma  
<sup>c</sup>Average withdrawal time of procedures where no lesions were detected  
<sup>d</sup>Only 2 colonoscopies performed on this patient cohort;  
<sup>e</sup>Only 3 colonoscopies performed on this patient cohort.  
<sup>f</sup>% = percent; min = minutes; # = number, serious adverse events (SAEs) reported as totals.  
<sup>g</sup>\*Overall means reported with 95% confidence intervals except age reported with standard deviations.  
 doi:10.1371/journal.pone.0067017.t003

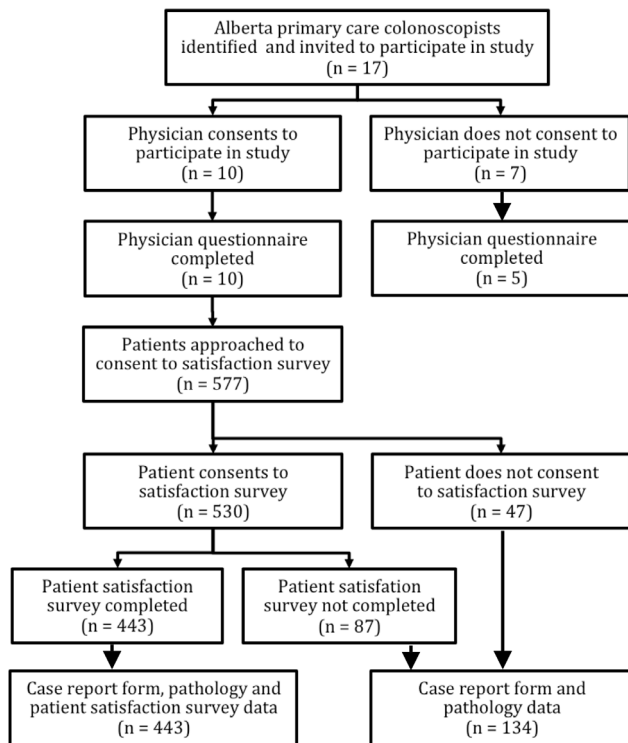

**Figure 1. Alberta Primary Care Endoscopy Study Participation Results.**

doi:10.1371/journal.pone.0067017.g001

ration rates ranging from 1/769 at a single academic centre in Alberta [46] to 1/833 at four hospitals in Winnipeg [44] to 1/1176 from a database involving colonoscopies in four provinces [45].

In our study, patients were highly satisfied with both their wait time for colonoscopy, and with their hospital experience during the colonoscopy. Previous studies demonstrate patient dissatisfaction with their wait time for a gastroenterologist consultation [47] and endoscopy [48]. Alberta has the longest gastrointestinal wait times of any province in Canada [9]. However, since wait time data were not collected and a control group was not identified, it remains unclear if wait times differences for consultation and endoscopy exist between PCP endoscopists and gastroenterologists.

Few patients were referred to specialists, implying that the study physicians are competent in managing their patients' clinical symptoms and endoscopic findings. The majority of patients were referred for definitive surgical management of their gastrointestinal condition. This referral pattern (from primary care colonoscopist to surgeon) may improve patient flow through the health care

## References

1. Alberta Cancer Board Division of Population Health (2008) Alberta Cancer Registry: 2005 Annual Report of Cancer Statistics.
2. Canadian Cancer Society's Steering Committee (2010) Canadian Cancer Statistics 2010.
3. Maciosek MV, Solberg LI, Coffield AB, Edwards NM, Goodman MJ (2006) Colorectal cancer screening: health impact and cost effectiveness. *Am J Prev Med* 31: 80–89.
4. Pignone M, Saha S, Hoerger T, Mandelblatt J (2002) Cost-effectiveness analyses of colorectal cancer screening: a systematic review for the U.S. Preventive Services Task Force. *Ann Intern Med* 137: 96–104.
5. American Society for Gastrointestinal Endoscopy (2000) Appropriate use of gastrointestinal endoscopy. *Gastroint Endosc* 52: 831–837.

system, and decrease the time between symptom onset and definitive care for diseases like colorectal cancer.

## Limitations

Only 10 of 17 Alberta primary care colonoscopists participated in the study. Practicing endoscopists who did not participate and less experienced colonoscopists may have different results. It is uncertain whether having both an endoscopy team member and the physician endoscopist complete the case report form eliminated all reporting bias, and as the physicians were aware of the study, the “Hawthorne Effect” may have inflated study outcomes. Furthermore, it is unclear whether the subset of patients who did not complete the satisfaction survey would have had similar patient satisfaction results as those who completed the survey. Finally, data collection occurred for only two months. While short evaluations of quality outcomes in endoscopy are common in Canada [8,41], collecting and reporting on outcomes over a longer term would be a logical progression.

## Conclusions

The APC-Endo Study is the most comprehensive study to date to report on the quality of colonoscopies performed by a group of PCPs. Relatively experienced PCP colonoscopists can achieve quality benchmarks in cecal intubation and adenoma detection with a low complication rate and high patient satisfaction. Based on these results, training selected PCPs in gastrointestinal medicine and endoscopy should be encouraged to improve patient access and decrease endoscopic wait times, especially in rural settings.

## Supporting Information

**Form S1 APC Endo Case Report Form.**  
(DOCX)

**Form S2 APC Endo Patient Satisfaction Survey.**  
(DOCX)

## Acknowledgments

The authors wish to thank the APC Endo Study physicians, their local endoscopy teams and their patients for their willingness and effort in participating in this study.

**The APC Endo Study Physicians are:** Bredesen LE, Davis P, Gibson NE, Kolber MR, Loge J, MacCarthy C, Murphy J, Rottger J, Torrie RD and Westra Y.

## Author Contributions

Conceived and designed the experiments: MRK BHR RNF CKWW. Performed the experiments: APC-ESP. Analyzed the data: MRK. Contributed reagents/materials/analysis tools: MRK BHR. Wrote the paper: MRK BHR RNF CKWW.

6. Robertson RH, Burkhardt JH, Powell MP, Eloubeidi MA, Pisu M, et al. (2006) Trends in colon cancer screening procedures in the US Medicare and Tricare populations: 1999–2001. *Prev Med* 42: 460–462.
7. Harewood GC, Lieberman DA (2004) Colonoscopy practice patterns since introduction of medicare coverage for average-risk screening. *Clin Gastroenterol Hepatol* 2: 72–77.
8. Armstrong D, Hollingworth R, Macintosh D, Chen Y, Daniels S, et al. (2011) Point-of-care, peer-comparator colonoscopy practice audit: The Canadian Association of Gastroenterology Quality Program-Endoscopy. *Can J Gastro* 25: 13–20.
9. Armstrong D, Barkun AN, Chen Y, Daniels S, Hollingworth R, et al. (2008) Access to specialist gastroenterology care in Canada: the Practice Audit in Gastroenterology (PAGE) Wait Times Program. *Can J Gastro* 22: 155–160.

10. Leddin D, Armstrong D, Barkun AN, Chen Y, Daniels S, Hollingworth R, et al. (2008) Access to specialist gastroenterology care in Canada: comparison of wait times and consensus targets. *Can J Gastro* 22: 161–167.
11. Paterson WG, Depew WT, Pare P, Petrunia D, Switzer C, et al. (2006) Canadian consensus on medically acceptable wait times for digestive health care. *Can J Gastro* 20: 411–423.
12. Hilsden RJ, Tepper J, Moayyedi P, Rabeneck L (2007) Who provides gastrointestinal endoscopy in Canada? *Can J Gastro* 21: 843–846.
13. Kolber M, Szafran O, Suwal J, Diaz M. (2009) Outcomes of 1949 endoscopic procedures: performed by a Canadian rural family physician. *Can Fam Physician* 55: 170–175.
14. Eckert LD, Short MW, Domagalski JE, Jaboori KA, Short PA (2009) Assessing Colonoscopy Training Outcomes using Quality Indicators. *Journal of Graduate Medical Education*: 89–92.
15. Short MW, Kelly KM, Runser LA (2007) Colonoscopy by a family physician: a case series demonstrating health care savings. *Mil Med* 172: 1089–1092.
16. Rodney WM, Dabov G, Cronin C (1993) Evolving colonoscopy skills in a rural family practice: the first 293 cases. *Fam Pract Res J* 13: 43–52.
17. Godreau CJ (1992) Office-based colonoscopy in a family practice. *Fam Pract Res J* 12: 313–320.
18. Carr KW, Worthington JM, Rodney WM, Gentry S, Sellers A, et al. (1998) Advancing from flexible sigmoidoscopy to colonoscopy in rural family practice. *Tenn Med* 91: 21–26.
19. Hopper W, Kyker KA, Rodney WM, Rosa S (1996) Colonoscopy by a family physician: A 9-year experience of 1048 procedures. *J Fam Pract* 43: 561–566.
20. Kirby E (2004) Colonoscopy procedures at a small rural hospital. *Can J Rural Med* 9: 89–93.
21. Pierzchajlo RP, Ackermann RJ, Vogel RL (1997) Colonoscopy performed by a family physician. A case series of 751 procedures. *J Fam Pract* 44: 473–480.
22. Newman RJ, Nichols DB, Cummings DM (2005) Outpatient colonoscopy by rural family physicians. *Ann Fam Med* 3: 122–125.
23. Shah HA, Paszat LF, Saskin R, Stukel TA, Rabeneck L (2007) Factors associated with incomplete colonoscopy: a population-based study. *Gastroenterology* 132: 2297–2303.
24. Strayer SM, Patterson D, Kington ML (2004) Who should Perform Screening Colonoscopies? A comparison of outcomes among different specialties. *Proceedings of the 32nd Annual North American Primary Care Research Group*; Orlando, FL. 2004.
25. Cotterill M, Gasparelli R, Kirby E (2005) Colorectal cancer detection in a rural community. Development of a colonoscopy screening program. *Can Fam Physician* 51: 1224–1228.
26. Wilkins T, LeClair B, Smolkin M, Davies K, Thomas A, Taylor ML, et al. (2009) Screening colonoscopies by primary care physicians: a meta-analysis. *Ann Fam Med* 7: 56–62.
27. Quigley EM, Rex DK (2009) Colonoscopy quality critical factor to thorough exam and best colon cancer detection: flawed analysis misleading on key quality indicators. *Am College Gastroenterol*. Available: <http://www.acg@smartbrief.com>.
28. Xirasagar S, Hurley TG, Sros L, Hebert JR (2010) Quality and Safety of Screening Colonoscopies Performed by Primary Care Physicians With Standby Specialist Support *Med Care*;48: 703–709.
29. Rabeneck L, Paszat LF, Saskin R (2010) Endoscopist specialty is associated with incident colorectal cancer after a negative colonoscopy. *Clin Gastroenterol Hepatol* 8: 275–279.
30. Bressler B, Paszat LF, Chen Z, Rothwell DM, Vinden C, et al. (2007) Rates of new or missed colorectal cancers after colonoscopy and their risk factors: a population-based analysis. *Gastroenterology* 132: 96–102.
31. Singh H, Nugent Z, Demers AA, Bernstein CN (2010) Rate and predictors of early/missed colorectal cancers after colonoscopy in Manitoba: a population-based study. *Am J Gastro* 105: 2588–2596.
32. Rex DK, Bond JH, Winawer S, Levin TR, Burt RW, et al. (2002) Quality in the technical performance of colonoscopy and the continuous quality improvement process for colonoscopy: recommendations of the U.S. Multi-Society Task Force on Colorectal Cancer. *Am J Gastro* 97: 1296–1308.
33. Rex DK, Petrini JL, Baron TH, Chak A, Cohen J, et al. (2006) Quality indicators for colonoscopy. *Gastrointest Endosc* 63: S16–28.
34. American Society for Gastrointestinal Endoscopy (2000) Quality and outcomes assessment in gastrointestinal endoscopy. *Gastrointest Endosc*. 526: 827–830.
35. University of Calgary Gastrointestinal Endoscopy Unit Patient Satisfaction Questionnaire (2009) Available: <http://www.cag-acg.org/uploads/patientsatisfactionquestionnaire.pdf>. Accessed 16 Oct 2009.
36. Leggett B, Whitehall V (2010) Role of the serrated pathway in colorectal cancer pathogenesis. *Gastroenterology* 138: 2088–2100.
37. Dominitz JA, Eisen GM, Baron TH, Goldstein JL, Hirota WK, et al. (2003) Complications of colonoscopy. *Gastrointest Endosc* 57: 441–445.
38. Eisen GM, Baron TH, Dominitz JA, Faigel DO, Goldstein JL, et al. (2002) Complications of upper GI endoscopy. *Gastrointest Endosc* 55: 784–793.
39. Cotton PB, Connor P, McGee D, Jowell P, Nickl N, et al. (2003) Colonoscopy: practice variation among 69 hospital-based endoscopists. *Gastrointest Endosc* 57: 352–357.
40. Aslinia F, Uradomo L, Steele A, Greenwald BD, Raufman JP (2006) Quality assessment of colonoscopic cecal intubation: an analysis of 6 years of continuous practice at a university hospital. *Am J Gastro* 101: 721–731.
41. Armstrong D, Hollingworth R, Gardiner T, Klassen M, Smith W, et al. (2006) Practice Audit in Gastroenterology (PAGE) program: a novel approach to continuing professional development. *Can J Gastro* 20: 405–410.
42. Barclay RL, Vicari JJ, Doughty AS, Johanson JF, Greenlaw RL (2006) Colonoscopic withdrawal times and adenoma detection during screening colonoscopy. *N Engl J Med* 355: 2533–2541.
43. Chen SC, Rex DK (2007) Endoscopist can be more powerful than age and male gender in predicting adenoma detection at colonoscopy. *Am J Gastro* 102: 856–861.
44. Singh H, Penfold RB, DeCoster C, Kaita L, Proulx C, et al. (2009) Colonoscopy and its complications across a Canadian regional health authority. *Gastrointest Endosc* 69: 665–671.
45. Rabeneck L, Paszat LF, Hilsden RJ, Saskin R, Leddin D, et al. (2008) Bleeding and perforation after outpatient colonoscopy and their risk factors in usual clinical practice. *Gastroenterology* 135: 1899–1906.
46. Misra T, Lalor E, Fedorak RN (2004) Endoscopic perforation rates at a Canadian university teaching hospital. *Can J Gastro* 18: 221–226.
47. Paterson WG, Barkun AN, Hopman WM, Leddin DJ, Pare P, et al. (2010) Wait times for gastroenterology consultation in Canada: the patients' perspective. *Can J Gastro* 24: 28–32.
48. Del Rio AS, Baudet JS, Fernandez OA, Morales I, Socas Mdel R (2007) Evaluation of patient satisfaction in gastrointestinal endoscopy. *Eur J Gastroenterol Hepatol* 19: 896–900.
